# Supplementary material
Source: MDPI journal article supplement (https://www.mdpi.com/2076-3263/8/8/303)
Supplement: s1 [file s1]

Archive with 2 entries (2 files):
- Figure_S2.pdf
- Figure_S1.pdf
