# Supplementary material
Source: MDPI journal article supplement (https://www.mdpi.com/2076-3263/8/8/303)
Supplement: s1 [file s1 › Figure_S1.pdf]

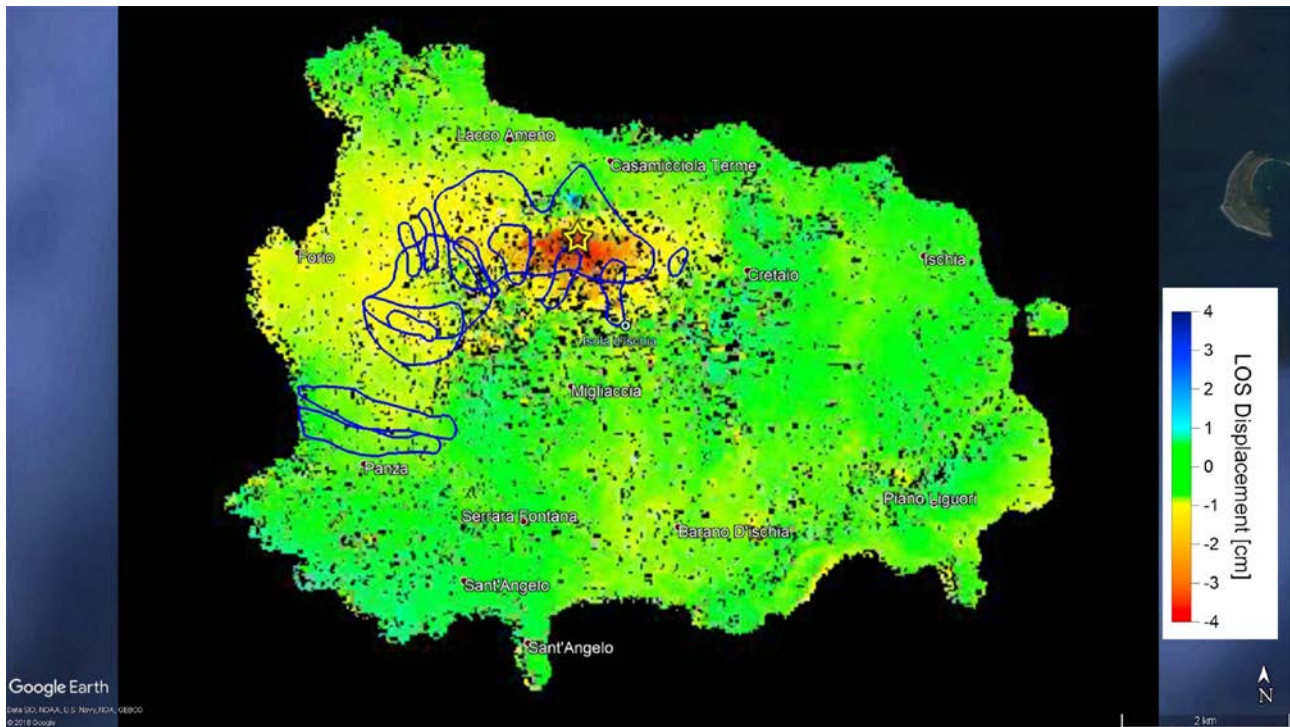

**Figure S1.** Sentinel-1 InSAR coseismic ground displacements along descending orbit (August 16, 2017 – August 22, 2017) processed by De Novellis et al. [9] (available at <https://agupubs.onlinelibrary.wiley.com/doi/abs/10.1002/2017GL076336>) superimposed to the areas affected by past earthquake-induced landslides (blue lines) [5]. The yellow star locates the Ischia earthquake epicenter.
