# Supplementary material
Source: MDPI journal article supplement (https://www.mdpi.com/2076-3263/8/8/303)
Supplement: s1 [file s1 › Figure_S2.pdf]

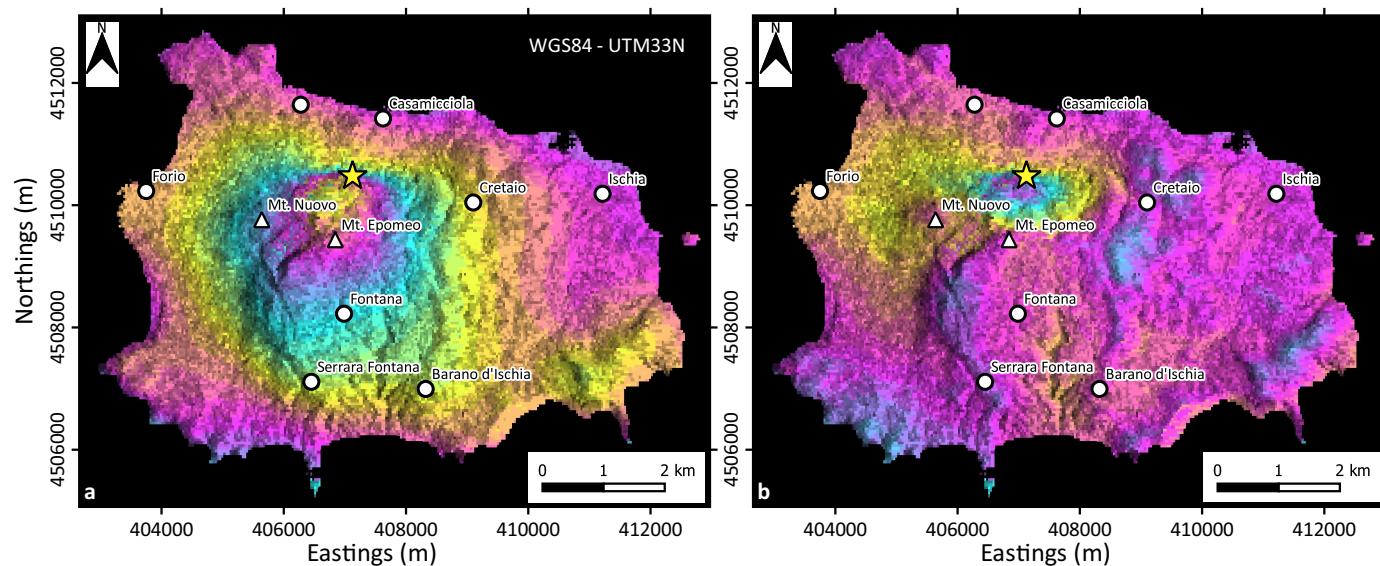

Figure S2. Wrapped S-1 descending interferogram before (a) and after (b) the atmospheric correction by means of GACOS procedure. The expected fringe pattern of the earthquake-induced deformation appears close to the epicenter (the yellow star), exactly where the ascending dataset detects the displacement.
